# Supplementary material for: A novel cucurbit[6]uril-based supramolecular coordination assembly as a multi-responsive luminescent sensor for Fe3+, Cr2O72− and isoquinoline antibiotics in aqueous medium
Source: Royal Society of Chemistry journal article supplement (doi:10.1039/c9tc02666e), 2019-01-01
Supplement: c9tc02666e1.pdf [file c9tc02666e1.pdf]

**A novel cucurbit[6]uril-based supramolecular coordination assembly  
as a multiresponsive luminescent sensor for Fe<sup>3+</sup>, Cr<sub>2</sub>O<sub>7</sub><sup>2-</sup> and  
isoquinoline antibiotics in aqueous medium**

Jiupeng Sun,<sup>a</sup> Pengpeng Guo,<sup>a</sup> Mei Liu,<sup>\*a, b</sup> Chunyan Chen,<sup>b</sup> Cao fang,<sup>b</sup> Hui Li<sup>a, b</sup>

<sup>a</sup>School of Chemistry and Life Science, Changchun University of Technology, Changchun 130012,  
China

<sup>b</sup>Advanced Institute of materials Science, Changchun University of Technology, Changchun, 130012,  
China

Crystallographic data for **1** has been deposited with the Cambridge Crystallographic Data Centre with No. CCDC 1903202. Copies of the data can be obtained free of charge via the Internet at <http://www.ccdc.cam.ac.uk/conts/retrieving.html> or by post at CCDC, 12 Union Road, Cambridge CB2 1EZ, U.K. (Fax: 44-1223336033, E-mail: [deposit@ccdc.cam.ac.uk](mailto:deposit@ccdc.cam.ac.uk)).

**Table S1.** Crystal data and structure refinement for **1**

---

Compound

[Zn

(ACA)<sub>4</sub>]□CB[6]□[NH<sub>2</sub>(CH<sub>3</sub>)<sub>2</sub>]□8H<sub>2</sub>O

---

---

|                                       |                                                                      |
|---------------------------------------|----------------------------------------------------------------------|
| Empirical formula                     | C <sub>100</sub> H <sub>104</sub> N <sub>26</sub> O <sub>28</sub> Zn |
| Formula weight                        | 2183.46                                                              |
| Crystal system                        | Monoclinic                                                           |
| Space group                           | C2/c                                                                 |
| a (Å)                                 | 17.621(3)                                                            |
| b (Å)                                 | 21.874(3)                                                            |
| c (Å)                                 | 25.800(4)                                                            |
| α (°)                                 | 90                                                                   |
| β (°)                                 | 105.875(4)                                                           |
| γ (°)                                 | 90                                                                   |
| V (Å <sup>3</sup> )                   | 9565(3)                                                              |
| Z                                     | 4                                                                    |
| D <sub>c</sub> /(g cm <sup>-3</sup> ) | 1.516                                                                |
| μ/(mm <sup>-1</sup> )                 | 0.355                                                                |
| F(000)                                | 4560                                                                 |
| θ range (°)                           | 2.482-28.391                                                         |
| R <sub>int</sub>                      | 0.0774                                                               |
| Parameters                            | 685                                                                  |
| T (K)                                 | 298                                                                  |
| goodness of fit                       | 1.082                                                                |
| Limiting indices                      | -23 ≤ h ≤ 23                                                         |
|                                       | -29 ≤ k ≤ 29                                                         |
|                                       | -34 ≤ l ≤ 34                                                         |
| R indices [I > 2σ(I)]                 | R <sub>1</sub> =0.0795, wR <sub>2</sub> =0.1923                      |
| R indices (all data)                  | R <sub>1</sub> =0.0933, wR <sub>2</sub> =0.2034                      |

---

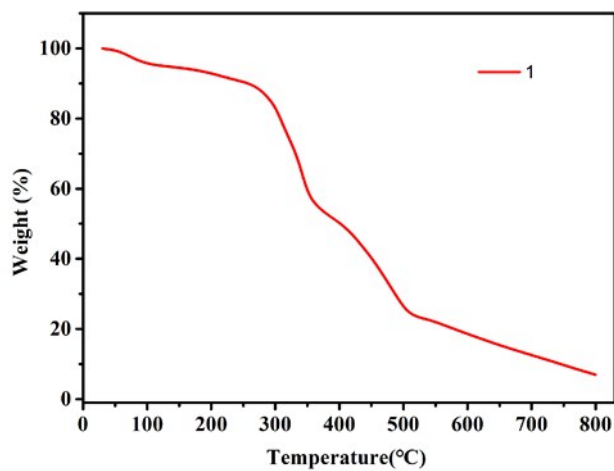

**Fig. S1** TGA curves of **1** under an atmosphere of  $N_2$  ( $5^\circ C\ min^{-1}$ ).

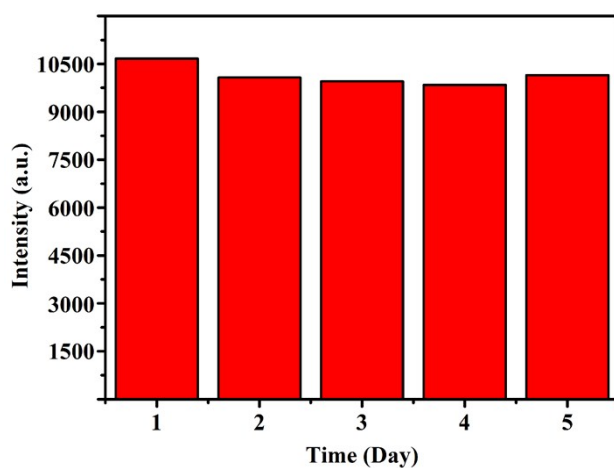

**Fig. S2** Fluorescence spectra of **1** dispersed in water with different times.

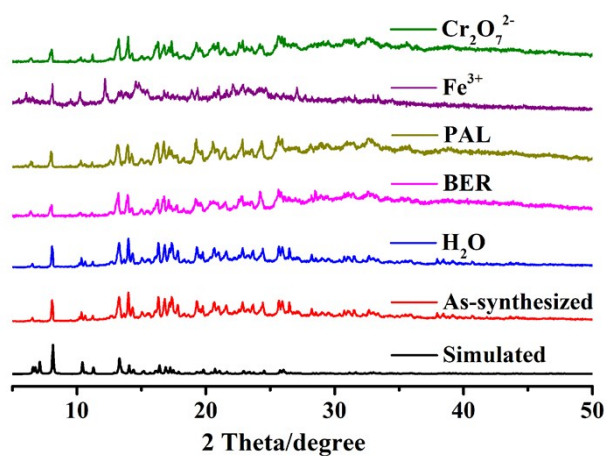

**Fig. S3** PXRD patterns of **1** simulate, as-synthesized, and after immersed in  $H_2O$ ,  $Fe^{3+}$ ,  $Cr_2O_7^{2-}$ , PAL and BER for comparison.

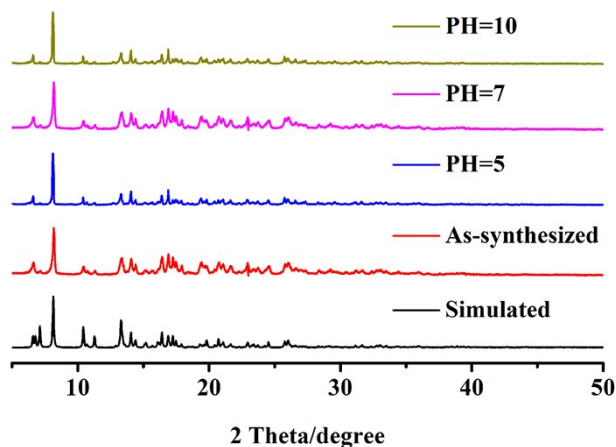

Fig. S4. PXRD patterns of **1** simulate, as-synthesized, and after treatment in acidic/alkaline aqueous solutions.

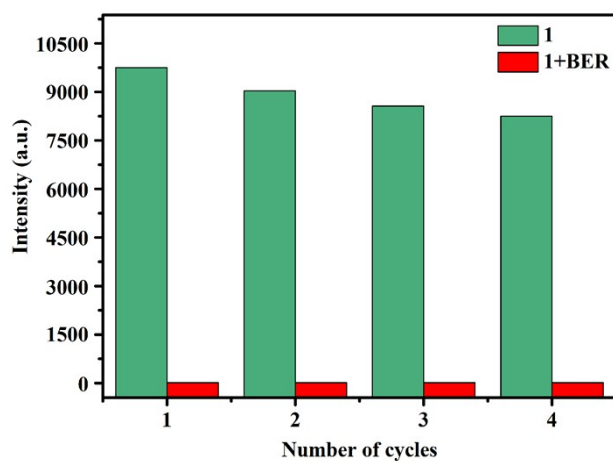

Fig. S5 Recyclability tests of **1** implemented with BER.

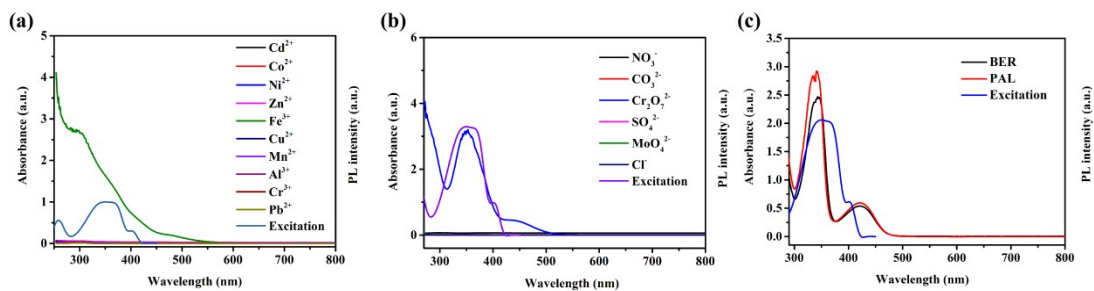

Fig. S6 UV-vis absorption spectra of different metal ions (a), inorganic anion (b),

antibiotics (c) in water, and excitation spectrum of **1**.

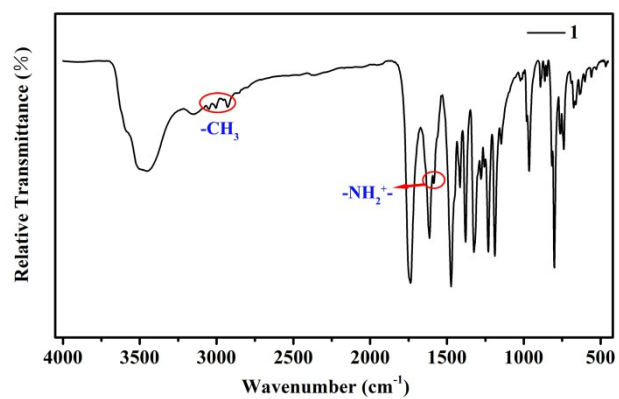

Fig. S7 IR spectra of **1**
